# Supplementary material for: Life Stages and Phylogenetic Position of the New Scale-Mite of the Genus Neopterygosoma (Acariformes: Pterygosomatidae) from Robert’s Tree Iguana
Source: MDPI journal article supplement (doi:10.3390/ani13172809), 2023-09-04
Supplement: s1 [file s1]

Table S1. Matrix of morphological characters used in phylogenetical analysis (Abbreviation of species names as in Table 1)

| Taxa              | 1  | 2  | 3  | 4  | 5  | 6  | 7  | 8  | 9  | 10 | 11 | 12 | 13 | 14 | 15 | 16 | 17 | 18 | 19 | 20 | 21 | 22                          | 23             | 24 | 25 | 26 | 27 | 28 | 29 | 30 | 31 | 32 | 33 | 34 | 35 | 36 | 37 | 38 | 39 | 40 |   |
|-------------------|----|----|----|----|----|----|----|----|----|----|----|----|----|----|----|----|----|----|----|----|----|-----------------------------|----------------|----|----|----|----|----|----|----|----|----|----|----|----|----|----|----|----|----|---|
| <i>Pim. pod.</i>  | 0  | 0  | 0  | 0  | 0  | 0  | -  | 0  | 0  | 0  | -  | 0  | 0  | 0  | 0  | 0  | 0  | 1  | 0  | -  | 0  | 0                           | 0              | 0  | 0  | 0  | 0  | 0  | -  | -  | -  | -  | -  | -  | -  | -  | -  | -  | -  | -  |   |
| <i>Gec. nit.</i>  | 0  | 1  | 0  | 0  | 0  | 1  | 1  | 0  | 2  | 1  | 1  | 1  | 0  | 1  | 0  | 1  | 0  | 2  | 1  | 0  | 1  | 1                           | 1              | -  | 1  | -  | 1  | 0  | 0  | 1  | 0  | 1  | 0  | 1  | 3  | 0  | 1  | 0  | -  | 0  |   |
| <i>Gec. ger.</i>  | 1  | 0  | 1  | 0  | 1  | 1  | 0  | 1  | 2  | 0  | -  | 0  | 1  | 1  | 1  | 1  | 1  | 0  | -  | 0  | 0  | 1                           | -              | 1  | 1  | 1  | 0  | 1  | -  | -  | -  | -  | 1  | 3  | -  | 1  | -  | -  | -  |    |   |
| <i>Gec. hir.</i>  | 0  | 0  | 1  | 1  | 0  | 1  | 1  | 0  | 0  | 1  | 1  | 0  | 1  | 1  | 1  | 1  | 0  | 1  | 2  | 0  | 0  | 1                           | -              | 2  | 1  | 1  | 0  | 1  | -  | -  | -  | -  | 1  | 3  | -  | 1  | -  | -  | -  |    |   |
| <i>Neo. pat.</i>  | 0  | 0  | 0  | 0  | 0  | 1  | 1  | 0  | 2  | 1  | 1  | 0  | 0  | 1  | 0  | 1  | 0  | 0  | 1  | 2  | 1  | 2 <sup>+</sup> <sub>3</sub> | 0              | 0  | 2  | 2  | 1  | 1  | 0  | 1  | 1  | 0  | 1  | 0  | 1  | 0  | 1  | 1  | 2  | 0  |   |
| <i>Neo. for.</i>  | 0  | 1  | 0  | 1  | 0  | 1  | 1  | 0  | 0  | 1  | 1  | 0  | 0  | 1  | 0  | 1  | 0  | 2  | 0  | -  | 1  | 3                           | 0              | 1  | 1  | 2  | 1  | 1  | 0  | 1  | 1  | 0  | 4  | 0  | 0  | 0  | 0  | 1  | 2  | 0  |   |
| <i>Neo. ova.</i>  | 1  | 1  | 0  | 0  | 0  | 1  | 1  | 0  | 0  | 1  | 0  | 0  | 0  | 1  | 0  | 1  | 0  | 4  | 0  | -  | 1  | 3                           | 1              | -  | 1  | 2  | 1  | 1  | 0  | 1  | 1  | 0  | 3  | 0  | 1  | 0  | 1  | 1  | 2  | 0  |   |
| <i>Neo. lig.</i>  | 0  | 1  | 0  | 0  | 0  | 1  | 1  | 0  | 2  | 1  | 1  | 0  | 0  | 1  | 0  | 1  | 0  | 3  | 0  | -  | 1  | 3                           | 0              | 2  | 1  | 2  | 1  | 1  | 0  | 0  | 1  | 0  | 3  | 0  | 1  | 0  | 0  | 1  | 1  | 0  |   |
| <i>Neo. lev.</i>  | 0  | 1  | 0  | 1  | 0  | 1  | 1  | 0  | 2  | 1  | 1  | 0  | 0  | 1  | 0  | 1  | 0  | 2  | 0  | -  | 1  | 2                           | 0              | 1  | 1  | 2  | 1  | 1  | 0  | 1  | 1  | 0  | 3  | 0  | 0  | 0  | 0  | 0  | 1  | 0  | 0 |
| <i>Neo. chil.</i> | 0  | 1  | 0  | 0  | 0  | 1  | 1  | 0  | 2  | 1  | 1  | 0  | 0  | 1  | 0  | 1  | 0  | 1  | 1  | 1  | 1  | 3                           | 0              | 1  | 1  | 2  | 1  | 1  | 0  | 0  | 1  | 0  | 2  | 0  | 1  | 0  | 0  | 1  | 0  | 0  |   |
| <i>Neo. schr.</i> | 0  | 0  | 0  | 2  | 0  | 1  | 1  | 0  | 1  | 1  | 0  | 0  | 0  | 1  | 0  | 1  | 0  | 4  | 1  | 1  | 1  | 1                           | 0              | 0  | 1  | 2  | 1  | 1  | 0  | 1  | 1  | 0  | 2  | 0  | 0  | 0  | 0  | 1  | 0  | 2  | 0 |
| <i>Neo. cya.</i>  | 0  | 0  | 0  | 2  | 0  | 1  | 0  | 0  | 2  | 1  | 0  | 1  | 0  | 1  | 0  | 1  | 0  | 2  | 1  | 3  | 0  | 2                           | 0 <sup>+</sup> | 0  | 1  | 2  | 1  | 1  | 0  | 1  | 1  | 0  | 2  | 0  | 0  | 0  | 0  | 0  | 0  | -  | 0 |
| <i>Neo. rob.</i>  | 0  | 0  | 0  | 1  | 0  | 1  | 1  | 0  | 2  | 1  | 0  | 1  | 0  | 1  | 0  | 1  | 0  | 2  | 0  | -  | 0  | 1                           | 1              | -  | 1  | 2  | 1  | 1  | 0  | 1  | 1  | 0  | 2  | 0  | 2  | 1  | 1  | 1  | 2  | 1  |   |
| Taxa              | 41 | 42 | 43 | 44 | 45 | 46 | 47 | 48 | 49 | 50 | 51 | 52 | 53 | 54 | 55 | 56 | 57 | 58 | 59 | 60 | 61 | 62                          | 63             | 64 | 65 | 66 | 67 | 68 | 69 | 70 | 71 | 72 | 73 | 74 | 75 | 76 | 77 | 78 | 79 | 80 |   |

|                       |   |   |   |   |   |   |   |   |   |   |   |   |   |   |   |   |   |   |   |   |   |   |   |   |   |   |   |   |   |   |   |   |   |   |   |   |   |   |   |   |
|-----------------------|---|---|---|---|---|---|---|---|---|---|---|---|---|---|---|---|---|---|---|---|---|---|---|---|---|---|---|---|---|---|---|---|---|---|---|---|---|---|---|---|
| <i>Pim.<br/>pod.</i>  | - | - | - | - | - | 0 | 1 | 0 | 0 | 0 | 0 | 0 | 0 | 0 | 0 | 0 | 0 | 0 | 0 | 0 | 0 | 0 | 0 | 0 | - | 0 | 0 | 0 | 0 | 0 | - | - | 0 | 0 | 0 | 0 | 0 | 0 | 0 | 0 |
| <i>Gec.<br/>nit.</i>  | 0 | 0 | - | 1 | 1 | 0 | 0 | - | 1 | 0 | 0 | 0 | 0 | 0 | 0 | 0 | 0 | 1 | 1 | 0 | 1 | 0 | 0 | 0 | 1 | 0 | 0 | 0 | 0 | - | 0 | 0 | 0 | 0 | 0 | 0 | 0 | 1 | 0 | 0 |
| <i>Gec.<br/>ger.</i>  | - | 1 | 1 | 1 | 0 | 0 | 0 | - | 1 | 1 | 0 | 0 | 1 | - | 1 | - | 1 | - | 0 | 0 | 2 | 1 | 0 | 0 | - | 1 | 0 | 1 | 1 | 1 | 1 | - | 0 | 0 | 0 | 1 | 1 | 0 | 1 | 1 |
| <i>Gec.<br/>hir.</i>  | - | 0 | - | 1 | 1 | 0 | 0 | - | 1 | 1 | 1 | 0 | 1 | - | 1 | - | 1 | - | 0 | 0 | 2 | 1 | 0 | 0 | - | 1 | 0 | 1 | 1 | 1 | 1 | - | 1 | 1 | 0 | 1 | 0 | 1 | 0 | 0 |
| <i>Neo.<br/>pat.</i>  | 0 | 0 | - | 1 | 1 | 0 | 1 | 0 | 0 | 0 | 0 | 0 | 0 | 0 | 0 | 0 | 0 | 1 | 1 | 2 | 0 | 1 | 0 | 0 | 1 | 1 | 0 | 0 | 1 | 0 | 0 | 0 | 0 | 0 | 1 | - | 0 | 1 | 0 | 0 |
| <i>Neo.<br/>for.</i>  | 0 | 1 | 1 | 0 | 0 | 0 | 1 | 1 | 0 | 0 | 0 | 0 | 0 | 0 | 0 | 0 | 0 | 0 | 0 | 1 | 0 | 1 | 0 | 0 | 1 | 1 | 0 | 0 | 1 | 0 | 0 | 0 | 0 | 0 | 1 | - | 0 | 1 | 0 | 0 |
| <i>Neo.<br/>ova.</i>  | 0 | 1 | 1 | 0 | 0 | 1 | 1 | 1 | 0 | 0 | 0 | 0 | 0 | 0 | 0 | 0 | 0 | 1 | 1 | 0 | 0 | 1 | 1 | 0 | 1 | 1 | 0 | 0 | 1 | 0 | 1 | 0 | 0 | 1 | - | 0 | 1 | 0 | 0 |   |
| <i>Neo.<br/>lig.</i>  | 0 | 1 | 1 | 0 | 0 | 0 | 1 | 1 | 0 | 0 | 0 | 0 | 0 | 0 | 0 | 0 | 0 | 1 | 1 | 0 | 0 | 1 | 0 | 0 | 1 | 1 | 0 | 0 | 1 | 0 | 0 | 0 | 0 | 1 | - | 0 | 1 | 0 | 0 |   |
| <i>Neo.<br/>lev.</i>  | 0 | 1 | 0 | 0 | 0 | 1 | 1 | 1 | 0 | 0 | 0 | 0 | 0 | 0 | 0 | 0 | 0 | 1 | 1 | 0 | 0 | 1 | 0 | 0 | + | 1 | 1 | 0 | 0 | 0 | - | 1 | 0 | 0 | 1 | - | 0 | 1 | 0 | 0 |
| <i>Neo.<br/>chil.</i> | 1 | 1 | 0 | 0 | 0 | 0 | 1 | 1 | 0 | 0 | 0 | 0 | 0 | 0 | 0 | 0 | 0 | 1 | 1 | 0 | 0 | 1 | 0 | 1 | 1 | 1 | 0 | 0 | 0 | - | 1 | 0 | 0 | 1 | - | 0 | 1 | 0 | 0 |   |
| <i>Neo.<br/>schr.</i> | 0 | 1 | 1 | 0 | 0 | 0 | 1 | 0 | 0 | 0 | 0 | 0 | 0 | 0 | 0 | 0 | 0 | 1 | 0 | 0 | 0 | 1 | 0 | 1 | 1 | 1 | 0 | 0 | 0 | - | 1 | 0 | 0 | 1 | - | 0 | 1 | 0 | 0 |   |
| <i>Neo.<br/>cya.</i>  | 0 | 1 | 1 | 0 | 0 | 0 | 0 | - | 0 | 0 | 0 | 0 | 0 | 0 | 0 | 0 | 0 | 1 | 1 | 1 | 0 | 1 | 0 | 0 | 1 | 1 | 0 | 0 | 1 | 0 | 0 | 0 | 0 | 1 | - | 0 | 1 | 0 | 0 |   |
| <i>Neo.<br/>rob.</i>  | 0 | 1 | 1 | 0 | 0 | 0 | 1 | 1 | 1 | 1 | 1 | 1 | 0 | 1 | 0 | 1 | 0 | 1 | 1 | 1 | 1 | 0 | 1 | 0 | + | 1 | 1 | 0 | 0 | 0 | - | 1 | 0 | 0 | 1 | - | 0 | 1 | 0 | 0 |

**Taxa** 81 82 83 84 85 86 87 88 89 90 91 92 93 94 95 96 97 98 99 100 101 102 103 104 105 106 107 108 109 110 111 112 113 114 115 116 117 118 119 120

|                       |   |   |                |   |   |   |   |   |   |   |   |   |   |   |   |   |   |   |   |   |   |   |   |   |   |   |   |   |   |   |   |   |   |   |   |   |   |   |                             |   |   |   |
|-----------------------|---|---|----------------|---|---|---|---|---|---|---|---|---|---|---|---|---|---|---|---|---|---|---|---|---|---|---|---|---|---|---|---|---|---|---|---|---|---|---|-----------------------------|---|---|---|
| <i>Pim.<br/>pod.</i>  | 0 | 0 | 0              | 0 | 0 | 0 | 0 | 0 | 0 | 0 | 0 | 0 | 0 | 0 | 0 | 0 | 0 | 0 | 0 | 0 | 0 | 0 | 0 | 0 | 0 | 0 | 0 | 0 | 0 | 0 | 0 | 0 | 0 | 0 | 0 | 0 | 0 | - | -                           |   |   |   |
| <i>Gec.<br/>nit.</i>  | 0 | 0 | 1              | 0 | 0 | 0 | 0 | 0 | 0 | 0 | 1 | 1 | 0 | 0 | 0 | 1 | 1 | 0 | 0 | 0 | 0 | 0 | 0 | 0 | 0 | 0 | 1 | 0 | 1 | 0 | 0 | 1 | 1 | 0 | 1 | 1 | 1 | 2 | 3                           |   |   |   |
| <i>Gec.<br/>ger.</i>  | 1 | 0 | 1              | 1 | 1 | 1 | 0 | 0 | 1 | 1 | 1 | 0 | 0 | 1 | 1 | 1 | 0 | 0 | 0 | 1 | 1 | 1 | 1 | 1 | 1 | 1 | 1 | 1 | 1 | 1 | 1 | 1 | 1 | 0 | 1 | 0 | 0 | 1 | 1                           | 0 | - | 1 |
| <i>Gec.<br/>hir.</i>  | 0 | 0 | 1              | 1 | 1 | 0 | 1 | 0 | 0 | 1 | 1 | 0 | 1 | 0 | 1 | 1 | 0 | 1 | 1 | 1 | 1 | 1 | 1 | 1 | 1 | 1 | 1 | 1 | 1 | 1 | 1 | 0 | 1 | 1 | 0 | 0 | 1 | 1 | ?                           | ? | ? |   |
| <i>Neo.<br/>pat.</i>  | 0 | 0 | 0              | 0 | 0 | 0 | 0 | 0 | 0 | 0 | 0 | 0 | 0 | 0 | 1 | 0 | 0 | 0 | 0 | 0 | 0 | 0 | 0 | 0 | 1 | 0 | 0 | 1 | 0 | 0 | 1 | 0 | 0 | 1 | 1 | 1 | 1 | 0 | 0                           | - | 0 |   |
| <i>Neo.<br/>for.</i>  | 0 | 1 | -              | 0 | 0 | 0 | 1 | 0 | 0 | 0 | 0 | 0 | 0 | 0 | 1 | 0 | 0 | 0 | 0 | 0 | 0 | 1 | 0 | 0 | 0 | 1 | 0 | 0 | 1 | 0 | 0 | 0 | 0 | 0 | 1 | 1 | 0 | 1 | 1                           | 1 | 2 | 0 |
| <i>Neo.<br/>ova.</i>  | 0 | 0 | 0              | 0 | 0 | 0 | 0 | 1 | 0 | 0 | 0 | 0 | 0 | 0 | 0 | 0 | 0 | 0 | 0 | 0 | 0 | 0 | 0 | 0 | 1 | 0 | 0 | 1 | 0 | 0 | 0 | 0 | 0 | 0 | 1 | 1 | 0 | 1 | 1                           | 1 | 2 | 2 |
| <i>Neo.<br/>lig.</i>  | 0 | 0 | 0              | 0 | 0 | 0 | 0 | 1 | 0 | 0 | 0 | 0 | 0 | 0 | 0 | 0 | 0 | 0 | 0 | 0 | 0 | 0 | 0 | 0 | 0 | 0 | 0 | 0 | 0 | 0 | 0 | 0 | 0 | 0 | 1 | 1 | 0 | 1 | 0                           | 1 | 2 | 2 |
| <i>Neo.<br/>lev.</i>  | 0 | 0 | 1              | 0 | 0 | 0 | 0 | 1 | 0 | 0 | 0 | 0 | 0 | 0 | 0 | 0 | 0 | 0 | 0 | 0 | 0 | 0 | 0 | 0 | 0 | 1 | 0 | 0 | 1 | 0 | 0 | 0 | 0 | 0 | 1 | 1 | 0 | 1 | 1                           | 1 | 2 | 0 |
| <i>Neo.<br/>chil.</i> | 0 | 0 | 1              | 0 | 0 | 0 | 0 | 0 | 0 | 0 | 0 | 0 | 0 | 0 | 0 | 0 | 0 | 0 | 0 | 0 | 0 | 0 | 0 | 0 | 0 | 1 | 0 | 0 | 1 | 0 | 0 | 0 | 0 | 0 | 1 | 1 | 0 | 1 | 1                           | 1 | 2 | 1 |
| <i>Neo.<br/>schr.</i> | 0 | 1 | -              | 0 | 0 | 0 | 0 | 0 | 0 | 0 | 0 | 0 | 0 | 0 | 0 | 0 | 0 | 0 | 0 | 0 | 0 | 0 | 0 | 0 | 0 | 1 | 0 | 0 | 1 | 0 | 0 | 0 | 0 | 0 | 1 | 1 | 0 | 1 | 0                           | 1 | 2 | 1 |
| <i>Neo.<br/>cya.</i>  | 0 | 0 | 0 <sup>+</sup> | 0 | 0 | 0 | 0 | 1 | 0 | 0 | 0 | 0 | 0 | 0 | 0 | 0 | 0 | 0 | 0 | 0 | 0 | 0 | 0 | 0 | 1 | 0 | 0 | 1 | 0 | 0 | 0 | 0 | 0 | 1 | 1 | 0 | 1 | 0 | 0                           | - | 1 |   |
| <i>Neo.<br/>rob.</i>  | 0 | 0 | 0              | 0 | 0 | 0 | 0 | 0 | 0 | 0 | 0 | 0 | 0 | 0 | 1 | 0 | 0 | 0 | 0 | 0 | 0 | 0 | 0 | 0 | 0 | 1 | 0 | 0 | 1 | 0 | 0 | 1 | 0 | 1 | 1 | 0 | 1 | 0 | 0 <sup>+</sup> <sub>1</sub> | 0 | 0 |   |
