# Supplementary material for: Life Stages and Phylogenetic Position of the New Scale-Mite of the Genus Neopterygosoma (Acariformes: Pterygosomatidae) from Robert’s Tree Iguana
Source: MDPI journal article supplement (doi:10.3390/ani13172809), 2023-09-04
Supplement: s1 [file s1]

Supplement 1. List of morphological characters and character states used in the analyses (based on females only).

1. *Gnathosoma situated*: (0) apically; (1) displaced on dorsal side; (2) displaced on ventral side.
2. *Fixed cheliceral digit*: (0) spinous (smooth or with tines); (1) rounded (greatly reduced).
3. *Movable cheliceral digit*: (0) without basal spur; (1) with basal spur.
4. *Cheliceral shaft (narrow part)*: (0) longer than swollen cheliceral base; (1) equal or subequal with swollen cheliceral base; (2) shorter than swollen cheliceral base.
5. *Setal form of dorsal seta (dF) of palpal femur*: (0) tapered; (1) spur-like.
6. *Palp setae dF*: (0) smooth; (1) serrate.
7. *Serration of setae dF*: (0) serrate only distally; (1) serrate on all length.
8. *Shape of setae dF*: (0) tapered; (1) spur-like.
9. *Length of setae dF*: (0) shorter than dG; (1) equal or subequal with dG; (2) longer than dG.
10. *Palp setae dG*: (0) smooth; (1) serrate.
11. *Serration of setae dG*: (0) serrate only on distal half; (1) serrate on all length.
12. *Lateral seta l' on palpal tibia (l'Ti)*: (0) smooth; (1) with barely discernible serration.
13. *Palpal tarsus*: (0) fully articulated from palpal tibia; (1) partially or completely fused with palpal tibia.
14. *Seta sul of palpal tarusus*: (0) present; (1) absent.
15. *Eupathidion ul' of palpal tarsus*: (0) present ; (1) absent.
16. *Eupathidion ul'' of palpal tarsus*: (0) present; (1) absent.
17. *Solenidion  $\omega 1$  on palpal tarsus*: (0) present; (1) absent.
18. *Length of setae n*: (0) very short (35–45 long); (1) short (55–65 long); (2) average (70–90 long); (3) long (100–110 long); (4) very long ( $\geq 125$  long).
19. *Subcapitular setae n*: (0) smooth; (1) serrate.
20. *Serration of setae n*: (0) serrate only at tip; (1) with barely discernible serration on all length; (2) slightly serrate on all length; (3) densely serrate on all length.
21. *Peritremes*: (0) with barely visible chambers; (1) with clearly visible chambers.
22. *Number of peritremal chambers*: (0) less than 6; (1) 19–22; (2) 23–26; (3)  $>27$ .
23. *Free peritremal branch*: (0) present; (1) absent.
24. *Length of free peritremal branch (in  $\mu\text{m}$ )*: (0) short ( $<10$  long); (1) average (40 long); (2) long ( $>55$ ).
25. *Shape of idiosoma*: (0) longer than wide; (1) wider than long; (2) circular (almost as long as wide).
26. *Eyes situated*: (0) dorsally, outside propodonotal shield in lateral parts of idiosoma; (1) dorsally on propodonotal shield; (2) on ventral side between antero-lateral setae.
27. *Idiosomal hypertrichy*: (0) absent; (1) present.
28. *Numerous setae in mid-dorsal part of idiosoma*: (0) present; (1) absent.
29. *Numerous antero-median dorsal setae*: (0) grouped into mid-dorsal cluster; (1) not grouped into cluster.
30. *Setae of mid-dorsal cluster*: (0) increase in length from anterior to posterior part of the cluster; (1) subequal in length.
31. *Setae in mid-dorsal cluster grouped*: (0) in two distinct rows (small clusters); (1) in several rows (one large cluster).

32. *Length of setae in mid-dorsal cluster*: (0) short (<30  $\mu\text{m}$ ); (1) long (55–95  $\mu\text{m}$ ).
33. *Number of setae in mid-dorsal cluster*: (0) 10–20 ; (1) 40–50; (2) 60–70; (3) 80–90; (4) > 110.
34. *Antero-median setae*: (0) plumose; (1) with minute serration.
35. *Number of antero-lateral setae*: (0) 210–230; (1) 150–209; (2) 149–90; (3) <90.
36. *Number of dorso-median setae dm*: (0) >15 pairs of setae; (1) 1–5 pairs of setae.
37. *One much longer seta situated between antero-lateral setae*: (0) present; (1) absent.
38. *Setae vm1*: (0) smooth; (1) serrate.
39. *Serrate setae vm1*: (0) with barely discernible serration; (1) slightly serrate; (2) densely serrate.
40. *Number of ventro-median setae vm*: (0) over 10 pairs; (1) only 1–3 setae on each side.
41. *Setae vm*: (0) densely serrate; (1) slightly serrate.
42. *Setae on postero-lateral part of idiosomal dorsum*: (0) subequal with the remaining dorsal setae situated in anterior half of idiosoma; (1) much longer than the setae in anterior half of idiosoma.
43. *Setal form of long peripheral setae*: (0) tapered; (1) slightly apically expanded at tip.
44. *Peripheral setae*: (0) much longer than dorsal setae situated medially and laterally; (1) subequal with median and lateral setae on idiosomal dorsum.
45. *Peripheral setae situated dorsally and ventrally*: (0) much longer than the setae situated in anterior half of idiosomal dorsum; (1) subequal with setae situated in anterior half of idiosomal dorsum.
46. *Genital slit situated*: (0) ventrally; (1) dorsally or terminally.
47. *Genital setae*: (0) smooth; (1) serrate.
48. *Serration of genital setae*: (0) with barely discernible serration; (1) clearly serrate.
49. *Genital setae g2*: (0) absent; (1) present.
50. *Genital setae g3*: (0) absent; (1) present.
51. *Genital setae g4*: (0) absent; (1) present.
52. *Genital setae g5*: (0) absent; (1) present.
53. *Pseudoanal setae ps1*: (0) present; (1) absent.
54. *Setal form of setae ps1*: (0) tapered; (1) slightly apically expanded at tip.
55. *Pseudoanal setae ps2*: (0) present; (1) absent.
56. *Setal form of setae ps2*: (0) tapered; (1) slightly apically expanded.
57. *Pseudoanal setae ps3*: (0) present; (1) absent.
58. *Setal form of setae ps3*: (0) tapered; (1) slightly apically expanded.
59. *Pseudoanal setae ps4*: (0) absent; (1) present.
60. *Pseudoanal setae ps5*: (0) absent; (1) present.
61. *Length of legs II*: (0) considerably shorter than legs I; (1) slightly shorter than legs II; (2) subequal with legs I.
62. *Legs III and IV*: (0) directed posteriorly; (1) directed anteriorly.
63. *Length of coxae I*: (0) subequal to coxae II; (1) longer than coxae II.
64. *Coxal setae 1c*: (0) absent; (1) present.
65. *Setae 1a situated*: (0) on coxal plate; (1) outside coxal plate.
66. *Coxal field II*: (0) with a thick or fine line of separation between coxa III and IV; (1) without a line of separation between coxa III and IV.
67. *Coxal setae 2a*: (0) present; (1) absent.
68. *Setal form of coxal setae 2b*: (0) simple; (1) spur-like.
69. *Shape of setae 3a*: (0) tapered; (1) spur-like.

70. *Coxal setae 3a*: (0) smooth; (1) serrate.
71. *Serration of coxal setae 3a*: (0) slightly serrate or with barely discernible serration; (1) densely serrate.
72. *Setae 3a situated*: (0) on coxal plate; (1) outside coxal plate.
73. *Coxal setae 3c*: (0) present; (1) absent.
74. *Coxal setae 3d*: (0) present; (1) absent.
75. *Coxal setae 4a*: (0) present; (1) absent.
76. *Setal form of setae 4a*: (0) simple; (1) spur-like.
77. *Coxal setae 4b*: (0) absent; (1) present.
78. *Coxal setae 4c*: (0) present; (1) absent.
79. *Setal form of vTrI*: (0) tapered; (1) spur-like.
80. *Setal form of vTrII*: (0) tapered; (1) spur-like.
81. *Setal form of vTrIV*: (0) tapered; (1) spur-like.
82. *Setae vTrI-IV*: (0) serrate; (1) smooth.
83. *Serration of seta vTrI-IV*: (0) slightly serrate; (1) densely serrate.
84. *Seta ld'FI*: (0) present; (1) absent.
85. *Seta lv' on femur I*: (0) present; (1) absent.
86. *Seta dFII*: (0) present; (1) absent.
87. *Seta ld'' on femur II*: (0) present; (1) absent.
88. *Seta lv'' on femur II*: (0) absent; (1) present.
89. *Seta d on femur III*: (0) present; (1) absent.
90. *Seta ld' on femur III*: (0) present; (1) absent.
91. *Seta ld'' on femur III*: (0) absent; (1) present.
92. *Seta lv' on femur III*: (0) absent; (1) present.
93. *Seta v on femur III*: (0) present; (1) absent.
94. *Seta d on femur IV*: (0) present; (1) absent.
95. *Seta ld' on femur IV*: (0) present; (1) absent.
96. *Seta ld'' on femur IV*: (0) absent; (1) present.
97. *Seta lv' on femur IV*: (0) absent; (1) present.
98. *Seta v on femur IV*: (0) present; (1) absent.
99. *Seta d on genu I*: (0) present; (1) absent.
100. *Seta ld'' on genu I*: (0) present; (1) absent.
101. *Seta v'' on genu I*: (0) present; (1) absent.
102. *Seta d on genu II*: (0) present; (1) absent.
103. *Seta ld' on genu II*: (0) present; (1) absent.
104. *Seta ld'' on genu II*: (0) present; (1) absent.
105. *Seta v'' on genu II*: (0) present; (1) absent.
106. *Seta d on genu III*: (0) present; (1) absent.
107. *Seta ld' on genu III*: (0) present; (1) absent.
108. *Seta lv' on genu III*: (0) present; (1) absent.
109. *Seta d on genu IV*: (0) present; (1) absent.
110. *Seta ld' on genu IV*: (0) present; (1) absent.
111. *Seta lv' on genu IV*: (0) present; (1) absent.
112. *Solenidion on tibia III*: (0) absent; (1) present.
113. *Solenidion  $\omega 2$  on tarsi I*: (0) present; (1) absent.
114. *Length of fastigial seta ft*: (0) shorter than solenidion  $\omega 1$ ; (1) longer than solenidion  $\omega 1$ .

- 115. *Seta tc'' on tarsi II: (0) serrate; (1) smooth.*
- 116. *Solenidion w on tarsi III: (0) present; (1) absent.*
- 117. *Setae a' and a'' of tarsi I: (0) smooth; (1) serrate.*
- 118. *Setae tc' and tc'' of legs II–IV: (0) smooth; (1) serrate.*
- 119. *Serration of setae tc' and tc'' of legs II–IV: (0) with barely discernible serration; (1) slightly serrate; (2) clearly serrate .*
- 120. *Setae vs' and vs'' of legs IV: (0) with barely discernible serration; (1) slightly serrate; (2) densely serrate; (3) thick and densely serrate.*
